# Supplementary material for: PEG-based cleavable hydrogel microparticles with controlled porosity for permiselective trafficking of biomolecular complexes in biosensing applications
Source: Royal Society of Chemistry journal article supplement (doi:10.1039/d1tb02751d), 2022-01-01
Supplement: d1tb02751d1.pdf [file d1tb02751d1.pdf]

## Supporting Information

### PEG-based Cleavable Hydrogel Microparticles with controlled porosity for permiselective trafficking of biomolecular complexes in biosensing applications

Alessandra De Masi <sup>a,b</sup>, Pasqualina L. Scognamiglio <sup>\*a</sup>, Edmondo Battista <sup>\*c</sup>, Paolo A. Netti <sup>a,b,c</sup>, and Filippo Causa <sup>a,b,c</sup>

<sup>a</sup> Center for Advanced Biomaterials for Healthcare@CRIB, Istituto Italiano di Tecnologia (IIT), Largo Barsanti e Matteucci 53, 80125 Naples, Italy

<sup>b</sup> Dipartimento di Ingegneria Chimica dei Materiali e della Produzione Industriale (DICMAPI), University "Federico II", Piazzale Tecchio 80, 80125 Naples, Italy

<sup>c</sup> Interdisciplinary Research Centre on Biomaterials (CRIB), Università degli Studi di Napoli "Federico II", Piazzale Tecchio 80, 80125 Naples, Italy

\*Corresponding authors: P.L. Scognamiglio, [pasqualina.scognamiglio@iit.it](mailto:pasqualina.scognamiglio@iit.it); E. Battista, [edmondo.battista@unina.it](mailto:edmondo.battista@unina.it)

**Table S1:** Prepolymer solutions composition, in terms of PEGDA700 and DHEBA, and samples identification code.

| NAME  | PEGDA700 (w/v) % | DHEBA (w/v) % | R (mol PEG/mol Dheba) | X PEG | X DHEBA |
|-------|------------------|---------------|-----------------------|-------|---------|
| 15R40 | 15               | 0.1           | 42.9                  | 0.98  | 0.02    |
| 15R4  | 15               | 1             | 4.29                  | 0.81  | 0.19    |
| 10R40 | 10               | 0.07          | 40.8                  | 0.98  | 0.02    |
| 10R4  | 10               | 0.7           | 4.08                  | 0.81  | 0.19    |

**Table S2:** Flow rates and their ratio are imposed parameters; the capillary number  $Ca$  is calculated knowing the continuous phase properties and flow rate; mean droplet size and its standard deviation, frequency and spacing between two consequent droplets are obtained from the droplet generation videos analysis (Droplet Monitor software).

| R  | $Q_d$ ( $\mu$ L/min) | $Q_c$ ( $\mu$ L/min) | Size( $\mu$ m) | S.Dev.( $\mu$ m) | f (drops/s) | Spacing( $\mu$ m) | Ca       |
|----|----------------------|----------------------|----------------|------------------|-------------|-------------------|----------|
| 10 | 0.25                 | 2.5                  | 75             | 2.4              | 19.9        | 110.2             | 3.03E-02 |
| 10 | 0.5                  | 5                    | 70.3           | 6.5              | 38.6        | 101.2             | 6.07E-02 |
| 20 | 0.1                  | 2.0                  | 73.2           | 1.17             | 9.7         | 157.8             | 2.43E-02 |

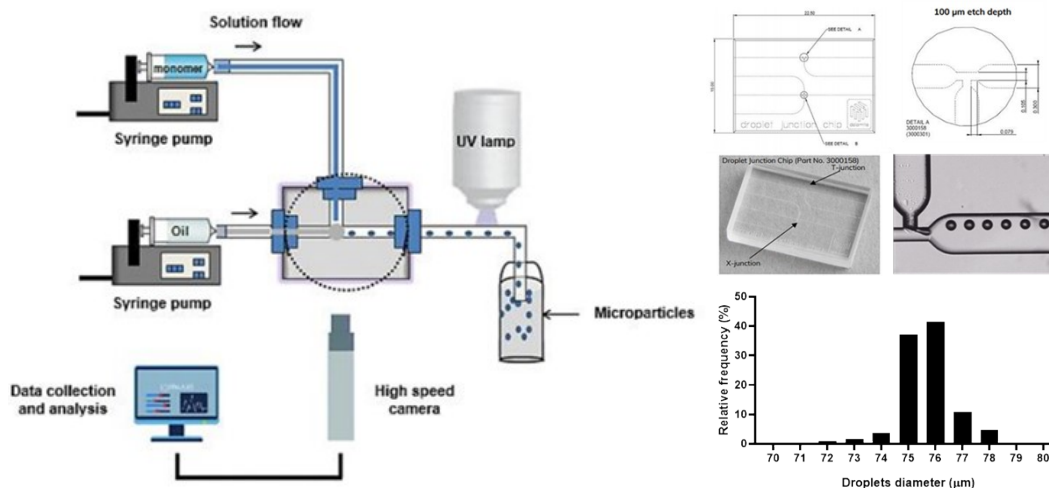

**Figure S1:** **Left:** Schematic illustration of the experimental microfluidic setup. Two syringe pumps push the solutions into the microfluidic channels, up to the T-junction where the droplet breakup occurs. Then the droplets are polymerized on flow in the outlet tube by means of an UV lamp and collected in a reservoir. A high-speed camera collects videos of the droplet formation and send the data to the software for the size and rate analysis; **Top Right:** Images and technical specification of the quartz hydrophobic droplet chip used for the W/O emulsion and an image of monodisperse droplets of 75  $\mu\text{m}$  produced with the T-Junction chip; **Bottom right:** frequency distribution of droplets diameter evaluated from the video analysis of about 1000 droplets production (10R40).

**Table S3:** Microparticles' mean radius ( $\mu\text{m}$ ) and standard deviation *pre-* and *post-* cleavage at 50  $^{\circ}\text{C}$  (overnight)

|              | Pre cleavage     | Post cleavage    |
|--------------|------------------|------------------|
| <b>15R4</b>  | 33.29 $\pm$ 1.04 | 36.78 $\pm$ 1.66 |
| <b>15R40</b> | 35.40 $\pm$ 1.34 | 39.65 $\pm$ 2.13 |
| <b>10R4</b>  | 35.99 $\pm$ 1.51 | 41.51 $\pm$ 2.80 |
| <b>10R40</b> | 33.87 $\pm$ 1.19 | 38.66 $\pm$ 1.33 |

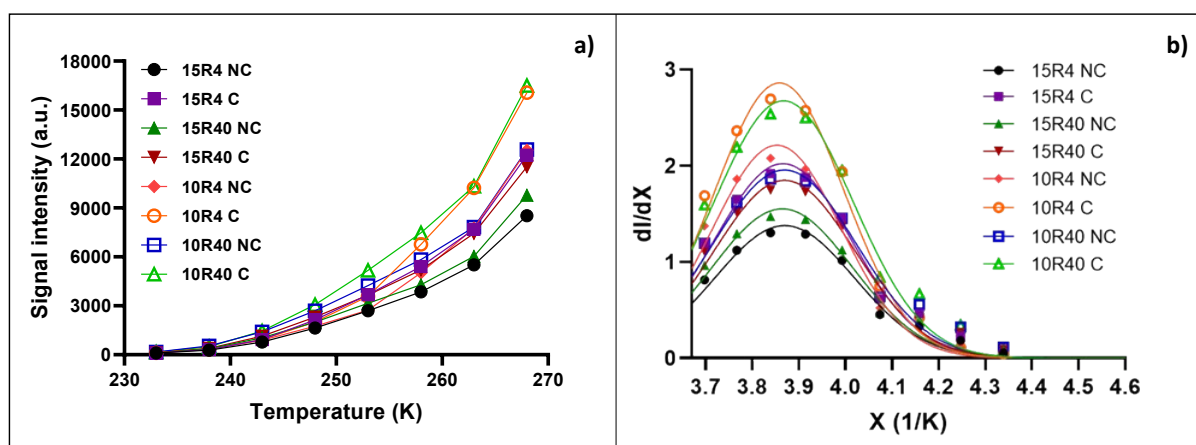

**Figure S2:** **a)** Variation of the NMR signal of water with the temperature for all the hydrogel compositions *pre-* and *post-* cleavage (IT curve); **b)** Derivative of the NMR signal with the inverse of temperature ( $\text{K}^{-1} = X$ , proportional to the pore radius) for all the hydrogel compositions.

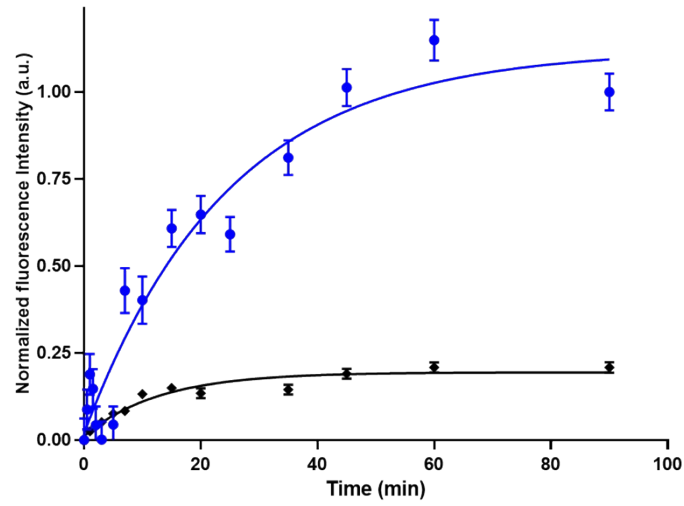

**Figure S3:** Diffusion kinetics of fluorescently labelled human IgG within 10R40 microparticles, before (black) and after the cleavage (blue).

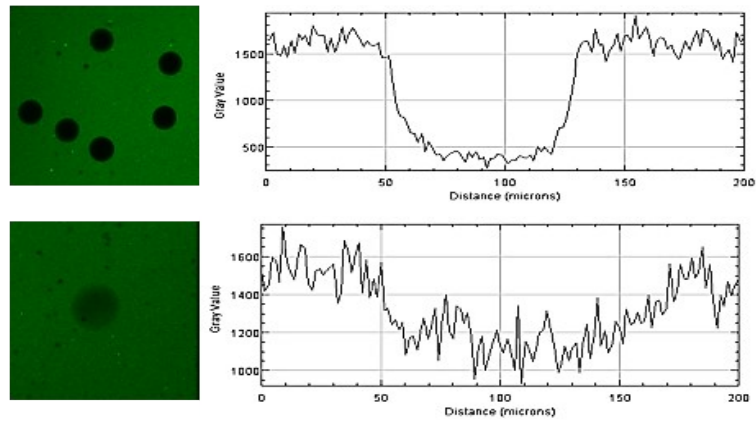

**Figure S4:** CLSM images and equilibrium fluorescence signal profile for the diffusion of a labelled IgG inside the 10R40 hydrogel microparticles, before (top) and after the cleavage (bottom);
